# Supplementary material for: Modulating the selectivity of near-IR fluorescent probes toward various metal ions by judicious choice of aqueous buffer solutions
Source: Royal Society of Chemistry journal article supplement (doi:10.1039/c0cc05554a), 2011-01-01
Supplement: c0cc05554a.pdf [file c0cc05554a.pdf]

## Supporting information

### Modulating the Selectivity of Near Infrared Fluorescent Probe Toward Various Metal Ions by Judicious Choice of Aqueous Buffer Solutions

Tanyu Cheng, Tao Wang, Weiping Zhu, Yangyang Yang, Bubing Zeng, Yufang Xu\*, and Xuhong Qian\*

*State Key Laboratory of Bioreactor Engineering; Shanghai Key Laboratory of Chemical Biology, School of Pharmacy;  
East China University of Science and Technology, Shanghai 200237, China*

1. **Materials and instruments**
2. **Synthesis of probe S1**
3. **pH titration**
4. **The selectivity of S2 for Cd<sup>2+</sup>, Hg<sup>2+</sup> and Pb<sup>2+</sup>**
5. **Cadmium titration**
6. **Competition experiments of cadmium**
7. **Mercury titration**
8. **Competition experiments of mercury**
9. **Determination of quantum yield**
10. **Determination of association constant**
11. **The characterization data of probe S1**
12. **References**

## 1. Materials and instruments

All the solvents were of analytic grade. The salts used in stock solutions of metal ions were  $\text{Hg}(\text{ClO}_4)_2 \cdot 3\text{H}_2\text{O}$ ,  $\text{Pb}(\text{ClO}_4)_2 \cdot 3\text{H}_2\text{O}$ ,  $\text{Zn}(\text{ClO}_4)_2 \cdot 6\text{H}_2\text{O}$ ,  $\text{Cr}(\text{ClO}_4)_3 \cdot 6\text{H}_2\text{O}$ ,  $\text{FeSO}_4 \cdot 7\text{H}_2\text{O}$ ,  $\text{FeCl}_3 \cdot 6\text{H}_2\text{O}$ ,  $\text{Ba}(\text{ClO}_4)_2 \cdot 3\text{H}_2\text{O}$ ,  $\text{Co}(\text{ClO}_4)_2 \cdot 6\text{H}_2\text{O}$ ,  $\text{Mn}(\text{ClO}_4)_2 \cdot 6\text{H}_2\text{O}$ ,  $\text{Cu}(\text{ClO}_4)_2 \cdot 6\text{H}_2\text{O}$ ,  $\text{Ca}(\text{ClO}_4)_2 \cdot 4\text{H}_2\text{O}$ ,  $\text{Ni}(\text{ClO}_4)_2 \cdot 6\text{H}_2\text{O}$ ,  $\text{LiClO}_4$ ,  $\text{NaClO}_4 \cdot \text{H}_2\text{O}$ ,  $\text{KClO}_4$ ,  $\text{CsClO}_4$ ,  $\text{AgClO}_4 \cdot \text{H}_2\text{O}$ ,  $\text{Cd}(\text{ClO}_4)_2 \cdot 6\text{H}_2\text{O}$ .  $^1\text{H}$ -NMR and  $^{13}\text{C}$ -NMR were measured on a Bruker Avance-400 spectrometer with chemical shifts reported in ppm (in  $\text{DMSO}-d_6$ ; TMS as internal standard). Mass spectra were measured on a HP 1100 LC-MS spectrometer. All pH measurements were made with a Sartorius PB-10 basic pH meter. Fluorescence spectra were determined on a Varian Cary Eclipse Fluorescence spectrophotometer. Absorption spectra were determined on a Varian Cary 100 Bio UV-Visible spectrophotometer.

## 2. Synthesis of probe S1

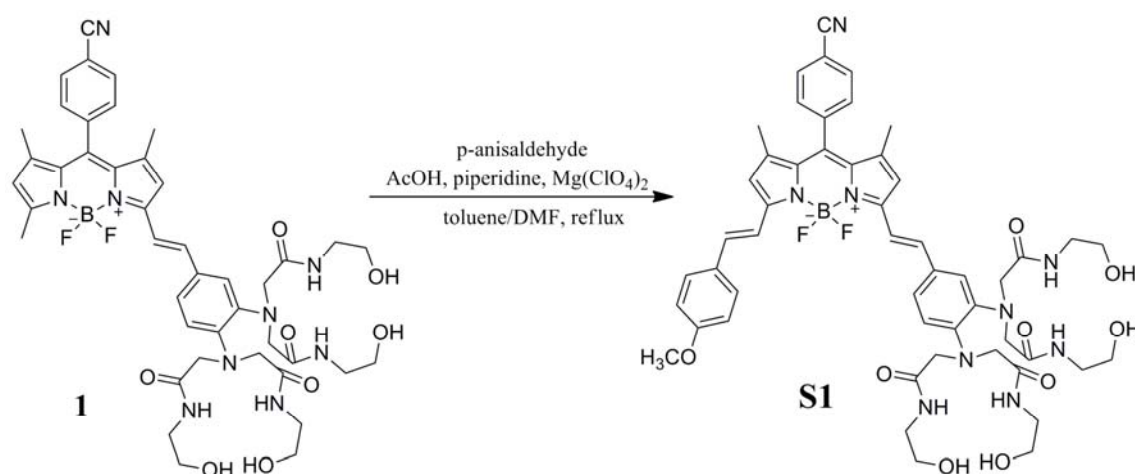

**1** (0.05 mmol) and 4-methoxybenzaldehyde (0.5 mmol) were dissolved in toluene (15 mL) and DMF (5 mL) with piperidine (0.12 mL), glacial acetic acid (0.1 mL), and catalytic amount of  $\text{Mg}(\text{ClO}_4)_2$ . The resulting mixture was refluxed, and the water formed during the reaction was removed azeotropically by heating in a Dean-Stark apparatus for about 2 hours. The solvent was removed under vacuum, and the residue was purified by silica column chromatography ( $\text{CH}_2\text{Cl}_2/\text{CH}_3\text{OH}$ , 9/1 to 7/1, v/v). The desired product **S1** was obtained as black solid in 37% yield.  $^1\text{H}$  NMR (400 MHz,  $\text{DMSO}-d_6$ )  $\delta$ : 1.40 (s, 6H), 3.10-3.11 (m, 8H), 3.32-3.33 (m, 8H), 3.83 (s, 3H), 4.03 (s, 4H), 4.09 (s, 4H), 4.61-4.65 (m, 4H), 6.93-6.97 (m, 3H), 7.05 (d,  $J = 8.4$  Hz, 2H), 7.12 (s, 1H), 7.18 (d,  $J = 8.0$  Hz, 1H), 7.35 (d,  $J = 16.4$  Hz, 1H), 7.43-7.46 (m, 2H), 7.55 (d,  $J = 16.4$  Hz, 1H), 7.63 (d,  $J = 8.8$  Hz, 2H), 7.73 (d,  $J = 8.0$  Hz, 2H), 8.07 (d,  $J = 8.0$  Hz, 2H);  $^{13}\text{C}$  NMR (100 MHz,  $\text{DMSO}-d_6$ )  $\delta$ : 14.9, 14.9, 41.8, 41.8, 54.7, 55.0, 55.8, 60.1, 60.2, 112.6, 115.1, 116.0, 116.4, 118.8, 119.0, 119.0, 121.0, 121.4, 121.5, 129.3, 129.5, 130.0, 130.5, 132.3, 132.5, 133.6, 135.8, 137.3, 138.5, 139.8, 141.2, 141.6, 143.6, 152.7, 153.4, 160.9, 170.3, 170.3; HRMS (ES<sup>+</sup>,  $[\text{M} + \text{H}]^+$ ): Calcd for  $\text{C}_{51}\text{H}_{58}\text{BF}_2\text{N}_9\text{O}_9$  990.4497; found, 990.4487.

## 3. pH titration

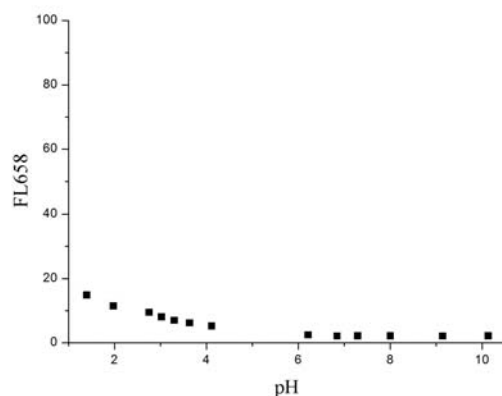

**Fig. S1.** The fluorescence Intensity of **S1** ( $5 \mu\text{M}$ ) at 658 nm as a function of pH in water solution (10% DMSO) (pH was adjusted by 75%  $\text{HClO}_4$  and NaOH). The samples were excited at 620 nm. Excitation and emission slit widths were both 5 nm.

#### 4. The selectivity of **S2** for $\text{Cd}^{2+}$ , $\text{Hg}^{2+}$ and $\text{Pb}^{2+}$

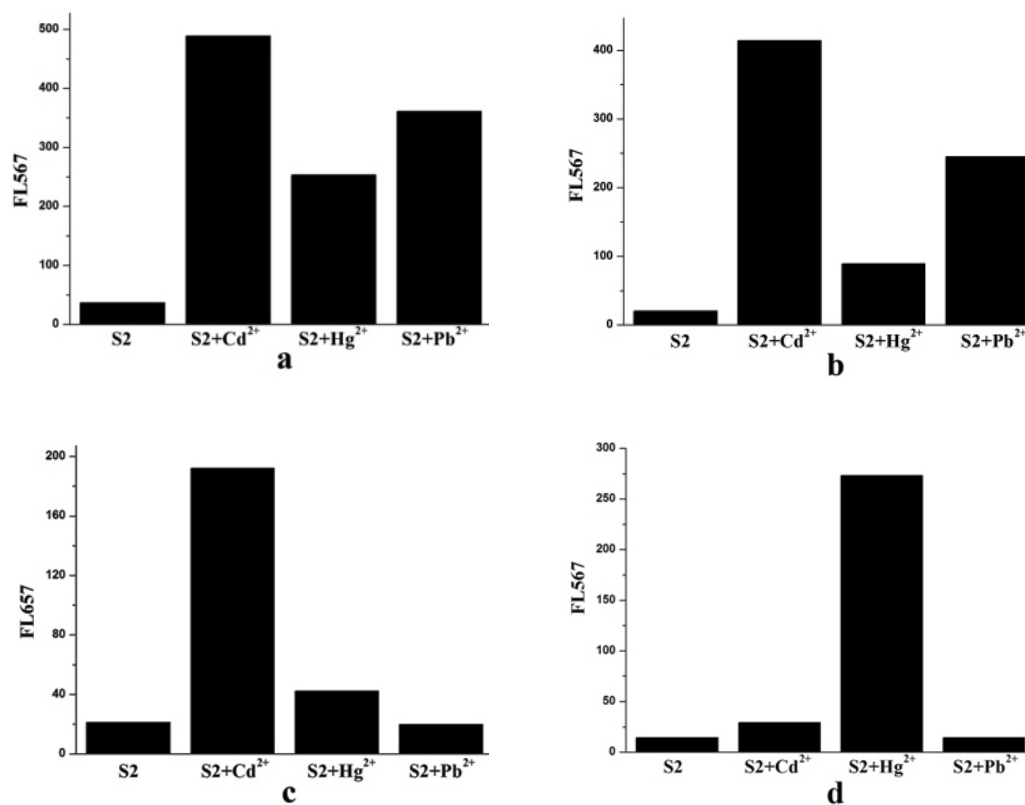

**Fig. S2** The fluorescent intensity of **S2** ( $4 \mu\text{M}$ ) in the absence and presence of  $\text{Cd}^{2+}$ ,  $\text{Hg}^{2+}$  or  $\text{Pb}^{2+}$  ( $20 \mu\text{M}$ ) emitted at 567 nm. (a) in 3-Morpholinopropanesulfonic Acid (MOPS) buffer solution (50 mM, 10% DMSO, pH = 7.0); (b) in HEPES buffer solution (10 mM, 10% DMSO, pH= 7.2, 10 mM NaCl); (c) in Tris-HCl (20 mM) buffer solution (containing 10% DMSO, 0.1 mM sodium phosphate, pH = 7.5); (d) in 50 mM citrate-phosphate buffer solution (pH = 7.0, 10% DMSO). The samples were excited at 555 nm. Excitation and emission slit widths were 2.5 nm and 5 nm.

## 5. Cadmium titration

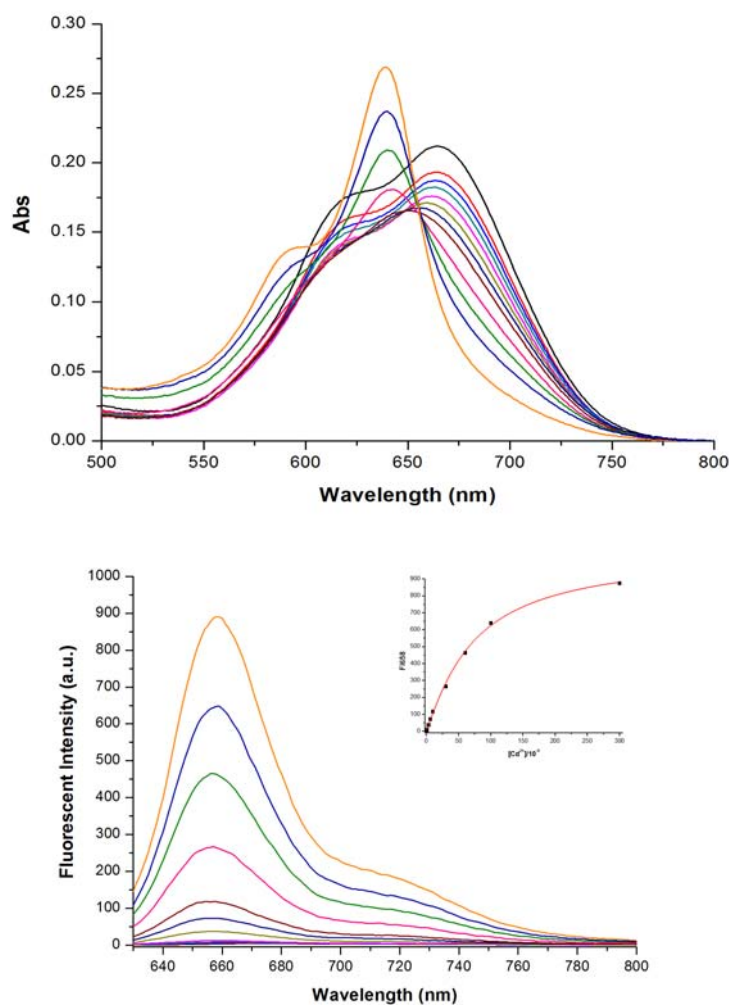

**Fig. S3.** The absorption (top) and emission (bottom) spectra of **S1** (5 μM) upon addition of Cd<sup>2+</sup> from 0 to 3 mM in Tris-HCl (0.02 M) solution (containing 10% DMSO, 0.1 mM sodium phosphate, pH=7.5). The samples were excited at 620 nm. Excitation and emission slit widths were both 5 nm. Inset: Curve of fluorescence intensity of **S1** at 658 nm versus the concentration of Cd<sup>2+</sup>.

## 6. Competition experiments of cadmium

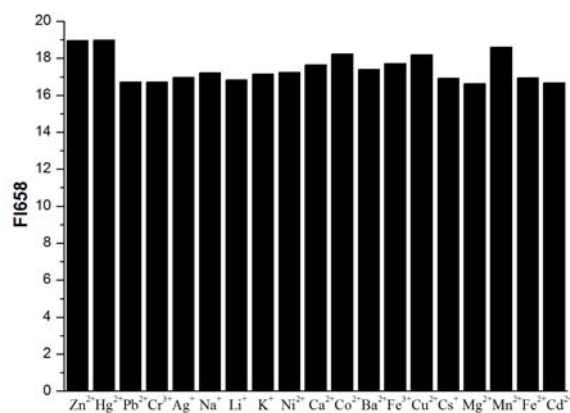

**Fig. S4.** The fluorescent intensity of **S1** ( $5 \mu\text{M}$ ) at  $658 \text{ nm}$  with  $5 \text{ equiv } \text{M}^{\text{n}+}$ , followed by  $3 \text{ equiv } \text{Cd}^{2+}$  in Tris-HCl ( $0.02 \text{ M}$ ) solution (containing  $10\% \text{ DMSO}$ ,  $0.1 \text{ mM}$  sodium phosphate,  $\text{pH}=7.5$ ). The samples were excited at  $620 \text{ nm}$ . Excitation and emission slit widths were both  $5 \text{ nm}$ .

## 7. Mercury titration

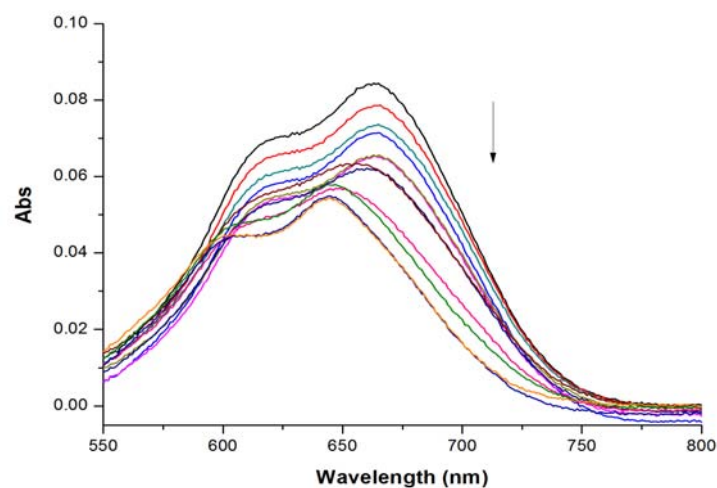

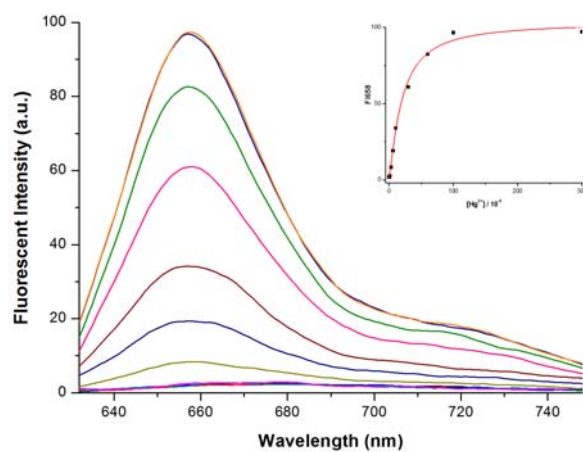

**Fig. S5.** The absorption (top) and emission (bottom) spectra of **S1** ( $2 \mu\text{M}$ ) upon addition of  $\text{Hg}^{2+}$  from 0 to 0.3 mM in citrate-phosphate buffer (0.05 M, 10% DMSO, pH= 7.0). The samples were excited at 620 nm. Excitation and emission slit widths were both 5 nm. Inset: Curve of fluorescence intensity of **S1** at 658 nm versus the concentration of  $\text{Hg}^{2+}$ .

## 8. Competition experiments of mercury

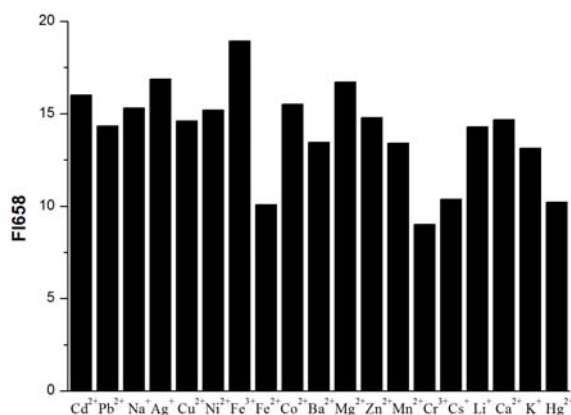

**Fig. S6.** The fluorescent intensity of **S1** (2  $\mu$ M) at 658 nm with 5 equiv  $M^{n+}$ , followed by 2.5 equiv  $Cd^{2+}$  in citrate-phosphate buffer (0.05 M, 10% DMSO, pH= 7.0). The samples were excited at 620 nm. Excitation and emission slit widths were both 5 nm.

## 9. Determination of quantum yield

The quantum yield of **S1** and **S1**- $Cd^{2+}$  were determined according to the literature<sup>2</sup>.

$$\Phi_S = \frac{\Phi_B I_S A_B \lambda_{exB} \eta_S}{I_B A_S \lambda_{exS} \eta_B}$$

Where  $\Phi$  is quantum yield;  $I$  is integrated area under the corrected emission spectra;  $A$  is absorbance at the excitation wavelength;  $\lambda_{ex}$  is the excitation wavelength;  $\eta$  is the refractive index of the solution; the  $S$  and  $B$  refer to the sample and the standard, respectively. We chose Rhodamine B with trifluoroacetic acid in absolute ethanol as standard, which has the quantum yield of 0.49.

## 10. Determination of association constant

$K_s$  was determined by a nonlinear least-squares analysis of  $Y$  versus  $c_M$  using the following equation<sup>3</sup>:

$$Y = \frac{Y_0 + c_M \Phi K_{11} [M] + Y_{lim} \beta_{21} [M]^2}{1 + K_{11} [M] + \beta_{21} [M]^2}$$

Where  $\beta_{21} = K_{11} K_{21}$ ,  $[M] \approx c_M$  is  $Cd^{2+}$  ion concentration,  $Y_0$  or  $Y$  is integrated emission in the absence or presence of  $Cd^{2+}$  ion,  $\Phi$  is the quantum yield of the sensor- $Cd^{2+}$  complex in 1:1 stoichiometry.





### $^{13}\text{C}$ NMR of **S1**

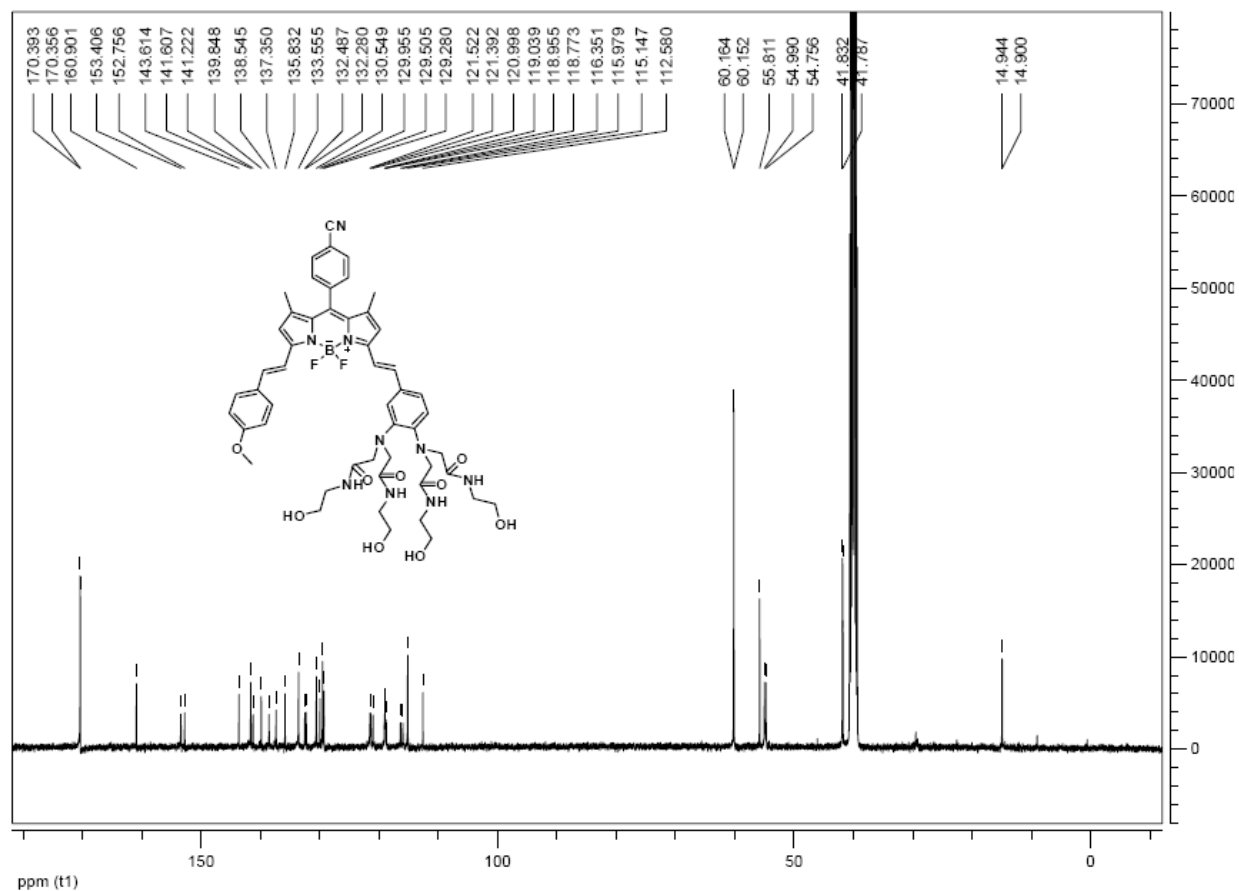

### HRMS spectrum of **S1**

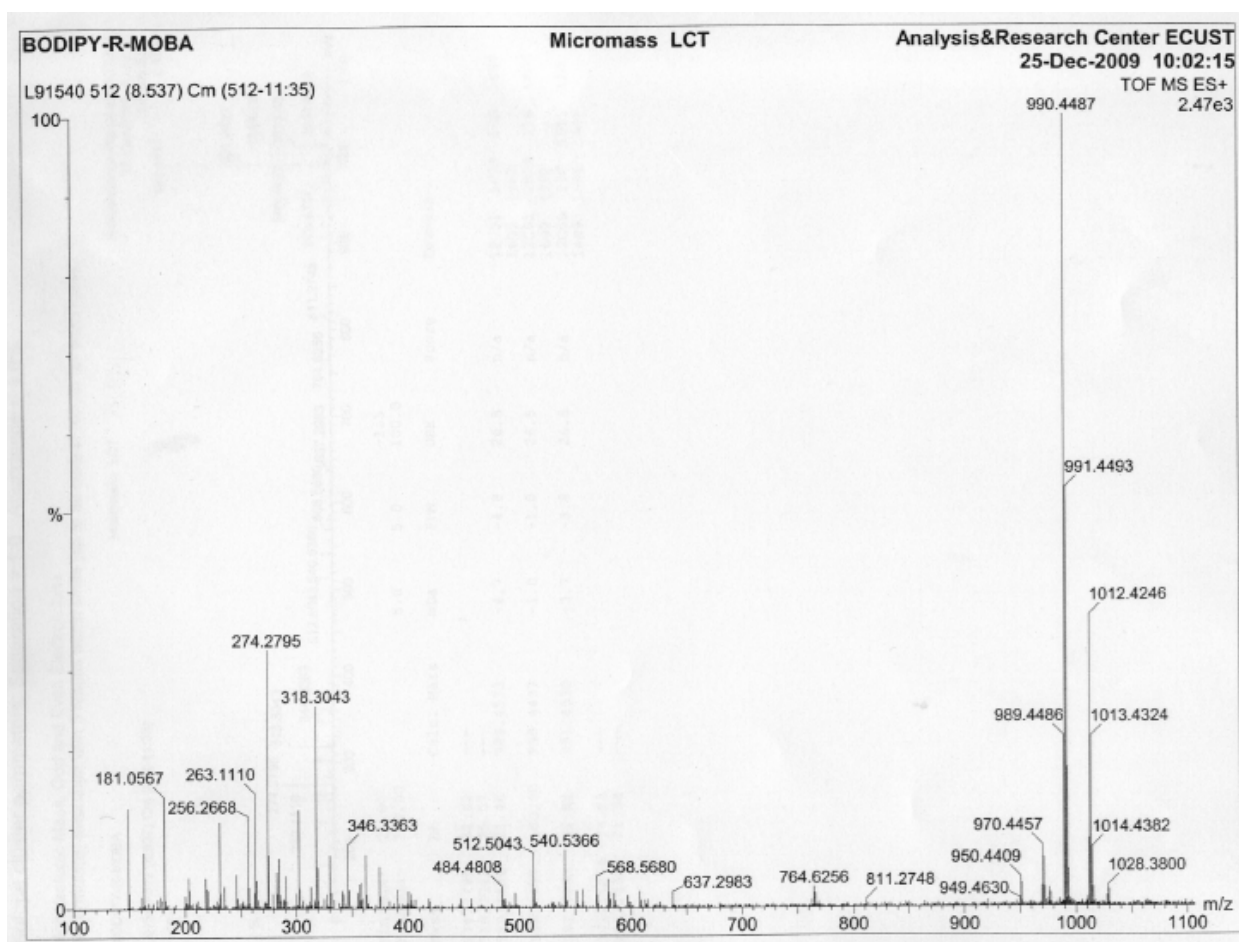

## 12. References

1. Cheng, T.; Xu, Y.; Zhang, S.; Zhu, W.; Qian, X.; Duan, L., *J. Am. Chem. Soc.* **2008**, *130*, 16160–16161.
2. Casey, K. G.; Quitevis, E. L., *J. Phys. Chem.* **1988**, *92*, 6590-6594.
3. Valeur, B., *Molecular Fluorescence: Principles and Applications*. Wiley-VCH: Weinheim, 2002.
